# Supplementary material for: Glypican-1 Level Is Elevated in Extracellular Vesicles Released from MC38 Colon Adenocarcinoma Cells Overexpressing Snail
Source: MDPI journal article supplement (doi:10.3390/cells9071585), 2020-06-30
Supplement: s1 [file s1]

**Table 2.** Primers used in real-time PRC analysis of proteoglycans mRNA expression level in MC38 clones and in EVs released from MC38 clones.

| Gene   | Sequence of primers 5' – 3'                             | Amplicon size | Accession number |
|--------|---------------------------------------------------------|---------------|------------------|
| EEF1A1 | S: CTGGAGCCAAGTGCTAATATGCC<br>AS: CCAGGCTTGAGAACACCAGTC | 221           | NM_010106.2      |
| Gapdh  | S: TGCACCACCAACTGCTTA<br>AS: GGATGCAGGGATGATGTTT        | 177           | NM_008084.3      |
| Gpc1   | S: CCAGAATGTTCTCGGGCCAT<br>AS: CATGGAGTCCAGGAGGTTTCT    | 162           | NM_016696.5      |
| Gpc2   | S: AGTTCGCGGACTCTTCTTT<br>AS: CACAACCTCCGGACGACCTTT     | 162           | NM_172412.2      |
| Gpc3   | S: GATCTATATTGGCGTTGCTG<br>AS: GTGGTCATGCAAGGCTGTA      | 239           | NM_016697.3      |
| Gpc4   | S: ATACAGAGCAGCTGAAGCCT<br>AS: GGTTCACCACGGACACTTTG     | 141           | NM_008150.2      |
| Gpc5   | S: GAGATCACCCAAGCCCAACA<br>AS: TGCTGTCTGGCATCCAGTTT     | 164           | NM_175500.4      |
| Gpc6   | S: AAGCCAGATACCTGCCTGAG<br>AS: TGTGTCATCACACGGAGA       | 135           | NM_011821.3      |
| Sdc1   | S: GCGGAAACCTACAGCCCTC<br>AS: ACAGCCACAATTTGCGGGA       | 237           | NM_011519.2      |
| Sdc2   | S: CTAGGCCCTCTTAGGCTTGC<br>AS: TGTCAGCTCTGTTCTCGTCT     | 140           | NM_008304.2      |
| Sdc3   | S: CAGCTCCCTCAGAAGAGCATA<br>AS: ACCCAGGATCACGGCTAC      | 60            | NM_011520        |
| Sdc4   | S: GCGTGGTAGGCATCCTCTTT<br>AS: AACTCATTGGTGGGGGCTTT     | 127           | NM_011521.2      |
| Lum    | S: ATGTGCGTTCTCTCTTGCTT<br>AS: GGAGGAACCATTGGCACACT     | 189           | NM_008524.2      |

gpc: glypican; sdc: syndecan; EEF1A1: elongation factor 1 alpha 1; GAPDH: glyceraldehyde-3-phosphate dehydrogenase; lum: lumican.
