# Supplementary material for: Glypican-1 Level Is Elevated in Extracellular Vesicles Released from MC38 Colon Adenocarcinoma Cells Overexpressing Snail
Source: MDPI journal article supplement (doi:10.3390/cells9071585), 2020-06-30
Supplement: s1 [file s1]

**Table 1.** List of antibodies used for immunocytochemistry and western immunoblotting,.

| Protein            | Catalog Numer, Company                         | Analysis, Dilution                        |
|--------------------|------------------------------------------------|-------------------------------------------|
| E-cadherin         | 610181, BD Biosciences (Bath, UK)              | WB, 1:1000, confocal microscopy<br>1:100, |
| $\beta$ -actin     | ab8227, Abcam (Cambridge, UK)                  | WB,1:2000                                 |
| Integrin $\beta$ 1 | Ab1952P, Merck Millipore (Molsheim, France)    | WB, 1:1000                                |
| $\beta$ -catenin   | 610153, BD Biosciences (Bath, UK)              | WB, 1:1000                                |
| Snail              | 3895, Cell Signaling Technology (Danvers, USA) | WB,1:1000                                 |
| Alix               | 2171, Cell Signaling Technology (Danvers, USA) | WB,1:1000                                 |
| Annexin V          | 8555, Cell Signaling Technology (Danvers, USA) | WB,1:1000                                 |
| HSP70              | 4876, Cell Signaling Technology (Danvers, USA) | WB,1:1000                                 |
| Cytochrome c       | ab13575, Abcam (Cambridge, UK)                 | WB,1:1000                                 |
| GAPDH              | ab181602, Abcam (Cambridge, UK)                | WB,1:20000                                |
| Glypican 1         | 16700-1-AP, proteintech (Manchester, UK)       | WB, 1:600                                 |
